# Supplementary material for: Promoting Respectful Maternity Care by Reducing Unnecessary Episiotomies: Experiences from Centers of Excellence for Breastfeeding in Vietnam
Source: MDPI journal article supplement (doi:10.3390/healthcare11182520), 2023-09-12
Supplement: s1 [file s1]

# Monthly Episiotomy Data Report Form

[illegible]
